# Supplementary material
Source: publisher figshare collection journal article supplement (https://tandf.figshare.com/ndownloader/files/14939990)
Supplement: Supplementary file 1 [file 14939990]

*Supplementary Table 2. Participant Characteristics (Detailed)*

| P# | Gender | Age | Ethnicity      | Most Recent Diagnosis                     | Age of Injury (Most Recent) | ABI History (including to-date)                                                                                                                                                                                                                       | Highest Level of School Completed                                    | Occupation (before injury)                                                                      | Occupation (after injury)                                                                                              | Occupation (currently)                                                               | High school Volunteer hours (out of 40)*    | Accommodations (before injury)                                                                                                                                                  | Accommodations (after injury)                                                                                                                                                                                                                                                                                                                                                                                                                                                                                                   | Accommodations (currently)                                                                                                                                                                                                           |
|----|--------|-----|----------------|-------------------------------------------|-----------------------------|-------------------------------------------------------------------------------------------------------------------------------------------------------------------------------------------------------------------------------------------------------|----------------------------------------------------------------------|-------------------------------------------------------------------------------------------------|------------------------------------------------------------------------------------------------------------------------|--------------------------------------------------------------------------------------|---------------------------------------------|---------------------------------------------------------------------------------------------------------------------------------------------------------------------------------|---------------------------------------------------------------------------------------------------------------------------------------------------------------------------------------------------------------------------------------------------------------------------------------------------------------------------------------------------------------------------------------------------------------------------------------------------------------------------------------------------------------------------------|--------------------------------------------------------------------------------------------------------------------------------------------------------------------------------------------------------------------------------------|
| 1  | M      | 19  | South Asian    | ABI; stroke                               | 7                           | 1 ABI; no previous ABI                                                                                                                                                                                                                                | high school (currently in 1st year university)                       | N/A                                                                                             | full-time student (after 1 year hospitalized)                                                                          | full-time student, part-time work, volunteering                                      | 68.5+                                       | no                                                                                                                                                                              | Elementary school; IEP                                                                                                                                                                                                                                                                                                                                                                                                                                                                                                          | University: additional time on tests/assignments, weighing tests/assignments differently, memory aid (ie. fact sheet), scribe (ie. dictate answers rather than write), excused from use of scantron<br>*accommodations vary by class |
| 2  | M      | 25  | Caucasian      | ABI; tumor near spinal cord               | 8                           | 1 ABI; no previous ABI                                                                                                                                                                                                                                | university                                                           | N/A                                                                                             | full-time student, part-time and full-time during summer, volunteering                                                 | part-time student, part-time work, volunteering                                      | 40+ (additional 75 hours after high school) | no                                                                                                                                                                              | Elementary school: slanted-up desk, AlphaSmart (little computer), additional time on tests<br>High school: no (personal preference)<br>University (undergrad): additional time on tests, smaller rooms for tests                                                                                                                                                                                                                                                                                                                | no                                                                                                                                                                                                                                   |
| 3  | M      | 21  | East Asian     | TBI; head impact (sport-related)          | 17                          | 2 major TBI, 3 minor TBI<br>13 years old; 1st major concussion, sport-related<br>16 years old; 2nd major concussion, sport-related<br>17 years old; most recent minor concussion, sport-related                                                       | high school (currently in 5th year university)                       | full-time student, not working, volunteering                                                    | full-time student (took one month off in high school), part-time during summer (after time off), volunteering          | full-time student, not working (but looking), not volunteering                       | 40-80                                       | no                                                                                                                                                                              | High school: exclusion from major project, additional time on tests                                                                                                                                                                                                                                                                                                                                                                                                                                                             | no                                                                                                                                                                                                                                   |
| 4  | F      | 22  | Caucasian      | TBI; head impact (sport-related)          | 19                          | 8 TBI<br>5 years old; 1st concussion, fall<br>8 years old; 2nd concussion, fall<br>16 years old; 2 concussions, sport-related<br>17 years old; 2 concussions, sport-related<br>Others: sport-related<br>19 years old; major concussion, sport-related | high school (currently in 5th year university)                       | full-time student, full-time work during summer, part-time work during school, not volunteering | full-time student (took one semester off in university), part-time work during school, volunteering                    | full-time student, not working, volunteering                                         | N/A                                         | no                                                                                                                                                                              | High school: challenging to get accommodations (additional time on tests, eating and resting during, private room for tests, turning off lights)<br>University (undergrad): additional time on tests, private room for tests                                                                                                                                                                                                                                                                                                    | University (undergrad): additional time on tests, private room for tests                                                                                                                                                             |
| 5  | F      | 21  | East Asian     | TBI; head impact (sport-related)          | 20                          | 4 TBI<br>18 years old; 2 concussions, sport-related<br>19 years old; concussion, sport-related<br>20 years old; concussion, sport-related                                                                                                             | high school (currently in 4th year university)                       | full-time student, full-time work during summer, part-time during school, volunteering          | part-time student, part-time work (after time off, only accepted "mini stuff"), volunteering                           | full-time student (reduced course-load), not working (but looking), not volunteering | 40                                          | no                                                                                                                                                                              | University (undergrad): note-taker, leaving class early, blue-screen computer background, computer dictation, additional time on tests, eating and resting during, private room for tests, turning off lights<br>*accommodations vary by class?                                                                                                                                                                                                                                                                                 |                                                                                                                                                                                                                                      |
| 6  | F      | 25  | Caucasian      | TBI; head impact (motor vehicle accident) | 23                          | 3+ (12 year history)<br>13 years old; 1st concussion, sport-related (TBI)<br>last two concussions = motor vehicle accident (TBI)                                                                                                                      | university (currently in Master's Degree)                            | full-time student, part-time work during summer, not volunteering                               | full-time student (took 6 weeks off), part-time work, not volunteering                                                 | full-time student, part-time work, not volunteering                                  | 40                                          | no                                                                                                                                                                              | University (undergrad): additional time on tests, time between tests, note-taker<br>*accommodations vary by class                                                                                                                                                                                                                                                                                                                                                                                                               | University (Master's degree): dimming lights, additional time on assignments<br>*accommodations vary by class                                                                                                                        |
| 7  | F      | 21  | European       | TBI; head impact (rollercoaster)          | 19                          | 7 TBI<br>18 months old; 1st concussion, fall<br>18 years old; major concussion, fall<br>Others: sport-related, head-impact<br>19 years old; concussion, rollercoaster                                                                                 | high school (currently in 4th year university)                       | full-time student, full-time work during summer, volunteering                                   | full-time student (took 1 month off), full-time work during summer (took 3 weeks off), volunteering                    | full-time student, part-time work, volunteering                                      | 95                                          | no                                                                                                                                                                              | University (undergrad): excused from classes and assignments (during first month), deferrals (but refused this option)                                                                                                                                                                                                                                                                                                                                                                                                          |                                                                                                                                                                                                                                      |
| 8  | F      | 24  | Latino         | TBI; head impact (fall)                   | 21                          | 1 TBI; no previous ABI<br>21 years old; 1st mild concussion, fall                                                                                                                                                                                     | university (currently in Master's Degree)                            | full-time student, full-time work during summer, volunteering                                   | part-time student, very minimal (if any) part-time work, volunteering (after a few months off)                         | full-time student, not working (but looking), not volunteering                       | N/A                                         | no                                                                                                                                                                              | University (undergrad): additional test on tests, assignment extensions, note-taker, private room for tests, deferred exams                                                                                                                                                                                                                                                                                                                                                                                                     | University (Master's degree): note-taker<br>*unknown accommodations for job-placement roles                                                                                                                                          |
| 9  | F      | 24  | Middle Eastern | TBI; head impact (fall)                   | 22                          | 4 TBI<br>18 years old; 1st concussion, fall<br>2nd concussion, fall<br>3rd concussion, fall<br>22 years old; 4th concussion, fall                                                                                                                     | high school (currently in 3rd year university)                       | not enrolled in school (but doing deferred school work), full-time work, volunteering           | part-time student (after 1 year off), part-time work after 1 year off, not volunteering                                | part-time student, not working (but looking), not volunteering                       | 200+                                        | yes (due to history of anxiety, depression, PTSD)<br>High school and University (undergrad): additional test on tests/exams, private room for tests<br>*standard accommodations | University (undergrad): additional time on tests/exams, private room for tests, excused for class, weighing assignments differently<br>*accommodations vary by class<br>* received more accommodations after concussion                                                                                                                                                                                                                                                                                                         |                                                                                                                                                                                                                                      |
| 10 | F      | 22  | East Asian     | TBI; head impact (bus)                    | 21                          | 1 TBI; no previous ABI<br>21 years old; 1st concussion, head-impact                                                                                                                                                                                   | high school (starting 1st year university again, after dropping out) | full-time student, part-time work, volunteering                                                 | no school (dropped out), part-time work (took 7 months off), no volunteering                                           | part-time, volunteering                                                              | 40+                                         | no                                                                                                                                                                              | University (undergrad): deferred classes, assignments, tests, excused from classes with physical activity                                                                                                                                                                                                                                                                                                                                                                                                                       | n/a - starting 1st university again                                                                                                                                                                                                  |
| 11 | F      | 22  | East Asian     | TBI; head impact (sport-related)          | 21                          | 2 TBI<br>Others: sport-related<br>21 years old; 2nd concussion, sport-related                                                                                                                                                                         | high school (currently in 4th year university)                       | full-time student, part-time work, no volunteering                                              | full-time student (after 1.5 months off), part-time work (after 4 months - fired from job due to ABI), no volunteering | full-time student, part-time work, volunteering (after 7 months off)                 | 300-400                                     | no                                                                                                                                                                              | University (undergrad): excused from classes and assignments (for 1.5 months), deferrals                                                                                                                                                                                                                                                                                                                                                                                                                                        | no<br>*refused accommodations due to lack of accessibility and didn't want to fall behind                                                                                                                                            |
| 12 | M      | 16  | European       | TBI; head impact (sport-related)          | 16                          | 4 TBI<br>12 years old; 1st concussion; sport-related<br>14 years old; 2nd concussion; sport-related<br>15 years old; 3rd concussion; sport-related<br>16 years old; 4th concussion; sport-related                                                     | elementary school (currently in gr. 11)                              | full-time student, not working, volunteering                                                    | part-time student (after 1.5 months off), not working, volunteering (after 3-4 weeks off)                              | part-time student, not working (but looking), volunteering                           | 50-60                                       | no                                                                                                                                                                              | High school: 9 Phase Concussion Protocol (Phase 1-5 for school, Phase 6-9 for extra-curricular activities)<br>Phase 1 = no attendance, bed rest<br>Phase 2 = trial attendance, no work, no tests, no assignments, limited stimulation<br>Phase 3 = half day, limited work, no assignments, no tests.<br>Phase 4 = full day attendance, introduction to homework, class work and participation, no assignments, no tests.<br>Phase 5 = routine day, no assignments, no tests, and accommodations are to be handed out if needed. |                                                                                                                                                                                                                                      |
| 13 | M      | 22  | Caucasian      | TBI; head impact (sport-related)          | 17                          | 4 to 6 TBI<br>Others: sport-related<br>17 years old; concussion, sport-related                                                                                                                                                                        | university                                                           | full-time student, part-time work during school, volunteering                                   | full-time student (took a few days off), part-time work during school, volunteering                                    | full-time work                                                                       | 40+                                         | no                                                                                                                                                                              | no                                                                                                                                                                                                                                                                                                                                                                                                                                                                                                                              | no                                                                                                                                                                                                                                   |
| 14 | M      | 18  | Caucasian      | TBI; head impact (sport-related)          | 16                          | 1 TBI; no previous ABI<br>16 years old; 1st concussion, fall                                                                                                                                                                                          | high school (recently graduated)                                     | full-time student, not working, volunteering                                                    | part-time student to full-time (after 2 weeks off - slow progression return), not working, no volunteering             | upcoming part-time job, volunteering                                                 | 150                                         | no                                                                                                                                                                              | High school: deferred test, assignments, big projects<br>*slowed pace                                                                                                                                                                                                                                                                                                                                                                                                                                                           | n/a - recently graduated                                                                                                                                                                                                             |

\* In Ontario, students are required to complete 40 hours of community involvement while in high school, in order to graduate
